# Supplementary material
Source: MDPI journal article supplement (https://www.mdpi.com/2073-4344/8/9/393)
Supplement: s1 [file s1]

Supplementary Information for

# A Zn-MOF-Catalyzed Terpolymerization of Propylene Oxide, CO<sub>2</sub>, and β-butyrolactone

Sudakar Padmanaban <sup>1</sup>, Sivanesan Dharmalingam <sup>2</sup> and Sungho Yoon <sup>1,\*</sup>

<sup>1</sup> Department of Applied Chemistry, Kookmin University, Seoul 02707, Korea; chemsuda@kookmin.ac.kr

<sup>2</sup> Greenhouse Gas Laboratory, Korea Institute of Energy Research, 152, Gajeong-ro, Yuseong-gu, Daejeon 34129, Republic of Korea; sivachem83@gmail.com

\* Correspondence: yoon@kookmin.ac.kr; Tel.: +82-02-910-4763

Received: 22 August 2018; Accepted: 5 September 2018; Published: date

**Table S1.** PXRD and BET data of ZnGA-20.

| Catalyst | L <sub>C(200)</sub> <sup>a</sup><br>(Å) | L <sub>C(210)</sub> <sup>a</sup><br>(Å) | L <sub>C(20-2)</sub> <sup>a</sup><br>(Å) | X <sub>c</sub> (%) <sup>b</sup> | Surface area<br>(m <sup>2</sup> /g) <sup>c</sup> | Mean pore<br>diameter (nm) <sup>c</sup> |
|----------|-----------------------------------------|-----------------------------------------|------------------------------------------|---------------------------------|--------------------------------------------------|-----------------------------------------|
| ZnGA-20  | 194.1                                   | 265.7                                   | 171.1                                    | 69.1                            | 22.7                                             | 32.4                                    |

<sup>a</sup> The coherence lengths in the corresponding directions (L<sub>C(hkl)</sub>) were calculated from the FWHM values using the Scherer's equation. <sup>b</sup> The degree of crystallinity (X<sub>c</sub>) was calculated from the integration of deconvoluted crystalline and amorphous peaks of the WAXD patterns. <sup>c</sup> Obtained from BET isotherm analysis.

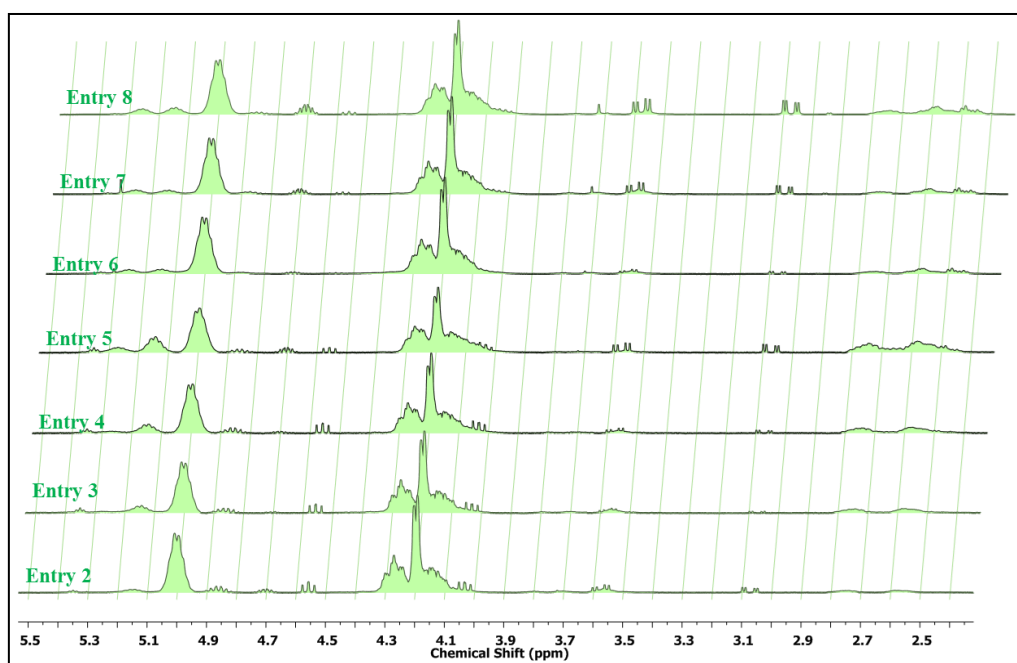

**Figure S1.** <sup>1</sup>H-NMR spectra of the polymers produced using the conditions described in Entries 2–8, Table 1.
